# Supplementary material for: The Disappearance Behavior, Residue Distribution, and Risk Assessment of Kresoxim-Methyl in Banana (Musa nana Lour.) Based on a Modified QuEChERS Procedure Using HPLC-MS/MS
Source: Frontiers journal article supplement (doi:10.3389/fenvs.2022.853033), 2022-05-10
Supplement: Table_1.docx [file Table_1.docx]

**TABLE S1** Matrix effects of kresoxim-methyl in the solvent and matrix

| Matrix | Linear equation  (0.001-1.0 mg L-1) | *r*2 | Matrix effect  (%) |
| --- | --- | --- | --- |
| solvent | y =2×107x-698337 | 0.9997 |  |
| whole banana | y=2×107x-671228 | 0.9997 | -3.88 |
| pulp | y=2×107x-771515 | 0.9995 | 10.5 |
| peel | y=2×107x-449410 | 0.9998 | -35.7 |

*x*: the fungicide concentration.

*y*: the corresponding peak area.

**TABLE S2** STMR of kresoxim-methyl in banana in GZ and FCG

| PHI (days) | Residues  (mg kg-1) | STMR  (mg kg-1) |
| --- | --- | --- |
| 35 | 0.12, 0.13, 0.13, 0.16, 0.18, 0.19, 0.25, 0.32, 0.34, 0.46, 0.50, 0.54 | 0.22 |
| 42 | 0.03, 0.04, 0.06, 0.06, 0.07, 0.08, 0.12, 0.14, 0.14, 0.18, 0.22, 0.25 | 0.1 |

PHI: pre-harvest intervals.

STMR: supervised trials median residue.
